# Supplementary material for: Changes in the incidence of invasive disease due to Streptococcus pneumoniae, Haemophilus influenzae, and Neisseria meningitidis during the COVID-19 pandemic in 26 countries and territories in the Invasive Respiratory Infection Surveillance Initiative: a prospective analysis of surveillance data
Source: PubMed Central journal article supplement (PMC8166576; doi:10.1016/s2589-7500(21)00077-7), 2021-05-24
Supplement: mmc1.pdf [file mmc1.pdf]

# THE LANCET

## Digital Health

### Supplementary appendix

This appendix formed part of the original submission and has been peer reviewed. We post it as supplied by the authors.

Supplement to: Brueggemann AB, Jansen van Rensburg MJ, Shaw D, et al. Changes in the incidence of invasive disease due to *Streptococcus pneumoniae*, *Haemophilus influenzae*, and *Neisseria meningitidis* during the COVID-19 pandemic in 26 countries and territories in the Invasive Respiratory Infection Surveillance Initiative: a prospective analysis of surveillance data. *Lancet Digit Health* 2021; **3**: e360–70.

## Supplementary Material

### Contents

|                                                                                                                                                                                                                   |    |
|-------------------------------------------------------------------------------------------------------------------------------------------------------------------------------------------------------------------|----|
| Supplementary Tables .....                                                                                                                                                                                        | 2  |
| Supplementary Table 1. Laboratories participating in the Invasive Respiratory Infection Surveillance (IRIS) initiative .....                                                                                      | 2  |
| Supplementary Table 2. Country-specific weekly interruption time points used in the time series analyses. ..                                                                                                      | 4  |
| Supplementary Methods.....                                                                                                                                                                                        | 5  |
| Equation for individual country models .....                                                                                                                                                                      | 5  |
| Supplementary Figures.....                                                                                                                                                                                        | 6  |
| Supplementary Figure 1. Interrupted time series modelling to quantify changes in the incidence of invasive disease due to four pathogens. ....                                                                    | 6  |
| Supplementary Figure 2. Annual invasive <i>H influenzae</i> cases submitted to Invasive Respiratory Infection Surveillance laboratories in 24 countries and territories from Jan 1, 2018, to May 31, 2020. ....   | 7  |
| Supplementary Figure 3. Annual invasive <i>N meningitidis</i> cases submitted to Invasive Respiratory Infection Surveillance laboratories in 21 countries and territories from Jan 1, 2018, to May 31, 2020. .... | 8  |
| Supplementary Figure 4. Annual invasive <i>S agalactiae</i> cases submitted to Invasive Respiratory Infection Surveillance laboratories in nine countries from Jan 1, 2018, to May 31, 2020. ....                 | 9  |
| Supplementary Figure 5. Assessment of the movement of people in Invasive Respiratory Infection Surveillance (IRIS) countries using Google COVID-19 Community Mobility Reports (CCMR) data. ....                   | 10 |

## Supplementary Tables

**Supplementary Table 1. Laboratories participating in the Invasive Respiratory Infection Surveillance (IRIS) initiative**

| Country                                                                   | Laboratory                                                                                                                                                                                                                                                           |
|---------------------------------------------------------------------------|----------------------------------------------------------------------------------------------------------------------------------------------------------------------------------------------------------------------------------------------------------------------|
| Belgium                                                                   | National Reference Centre for <i>Haemophilus influenzae</i> , Laboratoires des Hôpitaux Universitaires de Bruxelles - Universitaire Laboratorium Brussel, Brussels, Belgium; Faculté de Médecine et Pharmacie, Université de Mons, Mons, Belgium                     |
|                                                                           | National Reference Centre for <i>Neisseria meningitidis</i> , Sciensano, Brussels, Belgium                                                                                                                                                                           |
|                                                                           | National Reference Centre for <i>Streptococcus pneumoniae</i> , University Hospitals Leuven, Leuven, Belgium; Department of Microbiology, Immunology and Transplantation, KU Leuven, Leuven, Belgium                                                                 |
| Brazil                                                                    | National Laboratory for Meningitis and Pneumococcal Infections, Center of Bacteriology, Institute Adolfo Lutz, São Paulo, Brazil                                                                                                                                     |
| Canada                                                                    | National Microbiology Laboratory, Public Health Agency of Canada, Winnipeg, Manitoba, Canada                                                                                                                                                                         |
| China                                                                     | Department of Pulmonary and Critical Care Medicine, Center of Respiratory Medicine, National Clinical Research Center for Respiratory Diseases, Institute of Respiratory Medicine, Chinese Academy of Medical Sciences, Peking Union Medical College, Beijing, China |
| Czech Republic                                                            | National Reference Laboratory for Haemophilus Infections, Centre for Epidemiology and Microbiology, National Institute of Public Health, Prague, Czech Republic                                                                                                      |
|                                                                           | National Reference Laboratory for Meningococcal Infections, Centre for Epidemiology and Microbiology, National Institute of Public Health, Prague, Czech Republic                                                                                                    |
|                                                                           | National Reference Laboratory for Streptococcal Infections, Centre for Epidemiology and Microbiology, National Institute of Public Health, Prague, Czech Republic                                                                                                    |
| Denmark                                                                   | Department of Bacteria, Parasites and Fungi, Statens Serum Institut, Copenhagen, Denmark                                                                                                                                                                             |
| England                                                                   | Meningococcal Reference Unit, National Infection Service, Public Health England, Manchester Royal Infirmary, Manchester, United Kingdom                                                                                                                              |
|                                                                           | Respiratory and Vaccine Preventable Bacteria Reference Unit, National Infection Service, Public Health England, London, United Kingdom                                                                                                                               |
| Finland                                                                   | Finnish Institute for Health and Welfare (THL), Helsinki, Finland                                                                                                                                                                                                    |
| France                                                                    | Institut Pasteur, Invasive Bacterial Infections Unit and National Reference Centre for Meningococci and <i>Haemophilus influenzae</i> , Paris, France                                                                                                                |
|                                                                           | Laboratory of Medical Biology and National Reference Centre for Pneumococci, Intercommunal Hospital of Créteil, Créteil, France                                                                                                                                      |
| Germany                                                                   | German National Reference Center for Meningococci and <i>Haemophilus influenzae</i> , Institute for Hygiene and Microbiology, University of Würzburg, Würzburg, Germany                                                                                              |
|                                                                           | German National Reference Center for Streptococci, Department of Medical Microbiology, University Hospital RWTH Aachen, Aachen, Germany                                                                                                                              |
| Hong Kong Special Administrative Region of the People's Republic of China | Department of Microbiology, The Chinese University of Hong Kong, Hong Kong                                                                                                                                                                                           |
|                                                                           | Microbiology Division, Public Health Laboratory Services Branch, Centre for Health Protection, Department of Health, Hong Kong                                                                                                                                       |
| Iceland                                                                   | Department of Clinical Microbiology, Landspítali, The National University Hospital of Iceland, Reykjavik, Iceland                                                                                                                                                    |
| Ireland                                                                   | Irish Meningitis and Sepsis Reference Laboratory, Children's Health Ireland at Temple Street, Dublin, Ireland                                                                                                                                                        |
| Israel                                                                    | Government Central Laboratories, Ministry of Health, Jerusalem, Israel                                                                                                                                                                                               |
| Luxembourg                                                                | Laboratoire National de Sante, Dudelange, Luxembourg                                                                                                                                                                                                                 |
| Netherlands                                                               | Department of Medical Microbiology and Infection Prevention and Netherlands Reference Laboratory for Bacterial Meningitis, Amsterdam University Medical Center, University of Amsterdam, Amsterdam, Netherlands                                                      |
| New Zealand                                                               | Meningococcal Reference Laboratory, Institute of Environmental Science and Research Limited, Porirua, New Zealand                                                                                                                                                    |

| <b>Country</b>   | <b>Laboratory</b>                                                                                                                                                                             |
|------------------|-----------------------------------------------------------------------------------------------------------------------------------------------------------------------------------------------|
|                  | Streptococcal Reference Laboratory, Institute of Environmental Science and Research Limited, Porirua, New Zealand                                                                             |
| Northern Ireland | Public Health Agency, Belfast, Northern Ireland                                                                                                                                               |
| Poland           | National Reference Centre for Bacterial Meningitis, National Medicines Institute, Warsaw, Poland                                                                                              |
| Scotland         | Bacterial Respiratory Infection Service, Scottish Microbiology Reference Laboratories, Glasgow, Scotland, United Kingdom                                                                      |
| South Africa     | Centre for Respiratory Diseases and Meningitis, National Institute for Communicable Diseases, Division of the National Health Laboratory Service, Johannesburg, South Africa                  |
| South Korea      | Department of Pediatrics, Seoul National University College of Medicine, Seoul, South Korea                                                                                                   |
|                  | Division of Infectious Diseases, Department of Internal Medicine, Korea University Guro Hospital, Korea University College of Medicine, Seoul, South Korea                                    |
| Spain            | Instituto de Recerca Pediatrica, Hospital Sant Joan de Deu, Barcelona, Spain                                                                                                                  |
| Sweden           | Department of Clinical Microbiology, Karolinska University Hospital, Stockholm, Sweden                                                                                                        |
|                  | National Reference Laboratory for <i>Neisseria meningitidis</i> , Department of Laboratory Medicine, Clinical Microbiology, Faculty of Medicine and Health, Örebro University, Örebro, Sweden |
| Switzerland      | Swiss National Reference Centre for invasive Pneumococci, Institute for Infectious Diseases, University of Bern, Bern, Switzerland                                                            |
| Wales            | Public Health Wales, Cardiff, Wales, United Kingdom                                                                                                                                           |

**Supplementary Table 2. Country-specific weekly interruption time points used in the time series analyses.**

| Country                                                                   | Week of the year 2020 <sup>a</sup> |
|---------------------------------------------------------------------------|------------------------------------|
| Belgium                                                                   | 12                                 |
| Brazil                                                                    | 12                                 |
| Canada                                                                    | 12                                 |
| China <sup>b</sup>                                                        | 5                                  |
| Czech Republic                                                            | 11                                 |
| Denmark                                                                   | 11                                 |
| England                                                                   | 12                                 |
| Finland                                                                   | 12                                 |
| France                                                                    | 11                                 |
| Germany                                                                   | 12                                 |
| Hong Kong Special Administrative Region of the People's Republic of China | 7                                  |
| Iceland <sup>b</sup>                                                      | 11                                 |
| Ireland                                                                   | 12                                 |
| Israel                                                                    | 11                                 |
| Luxembourg                                                                | 11                                 |
| Netherlands                                                               | 11                                 |
| New Zealand                                                               | 13                                 |
| Northern Ireland                                                          | 12                                 |
| Poland                                                                    | 11                                 |
| Scotland                                                                  | 12                                 |
| South Africa                                                              | 12                                 |
| South Korea                                                               | 8                                  |
| Spain                                                                     | 11                                 |
| Sweden                                                                    | 11                                 |
| Switzerland                                                               | 11                                 |
| Wales                                                                     | 12                                 |

<sup>a</sup> The chosen week for each country was based on the Google COVID-19 Community Mobility Reports (CCMR) data (see Figure 3 in the main text), selecting the week containing the midpoint of the decline in work-associated mobility.

<sup>b</sup> No Google CCMR data were available for China (due to censorship of Google data) and Iceland (the small national population presents a possible privacy breach). Iceland was assigned the modal week of other European countries, while China's interruption point was based on news reports of policy decisions and set at week 5 of 2020.

## Supplementary Methods

### Equation for individual country models

$$\log(\text{Count}_t) = \text{Intercept} + \beta_1(T_t) + \beta_2(\sin(2\pi(W_t)/52)) + \beta_3(\cos(2\pi(W_t)/52)) + \beta_4(\sin(\pi(W_t)/52)) + \beta_5(\cos(\pi(W_t)/52)) + \beta_6(S_t) + \beta_7(SI_t) + \varepsilon_t \text{ (Distribution Poisson, Scale 2)}$$

$\text{Count}_t$  = Cases in week  $t$

$T$  = time in weeks starting at week 1 2018

$W$  = week of year

$S_t$  = binary step change variable coded zero before COVID and 1 after COVID (with this change derived from the midpoint of the drop in mobility from Google data or equivalent)

$SI$  = slope change variable counting each week from the after the step change week

$\varepsilon$  = Error term following Poisson Distribution Poisson with scale 2

## Supplementary Figures

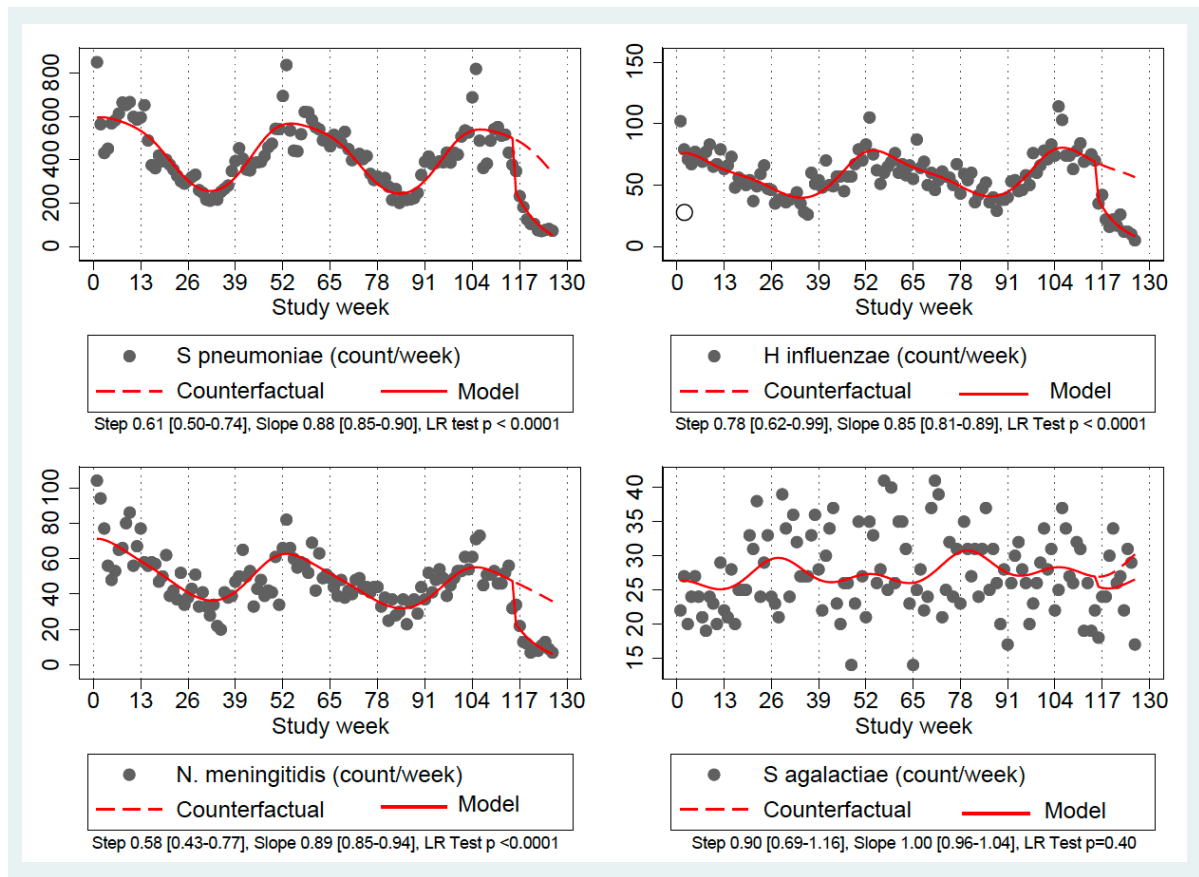

**Supplementary Figure 1. Interrupted time series modelling to quantify changes in the incidence of invasive disease due to four pathogens.** Observed counts per week are shown over the time period 1 January 2018 through 31 May 2020, a fitted model allowing for a step and slope change following week 11 of 2020 (study week 115), and a counterfactual model without this change for each species. Estimates for the step and slope (change per week) parameters and confidence intervals are given for each species, and a p-value from a likelihood ratio comparing models with both step and slope variables and models with neither.

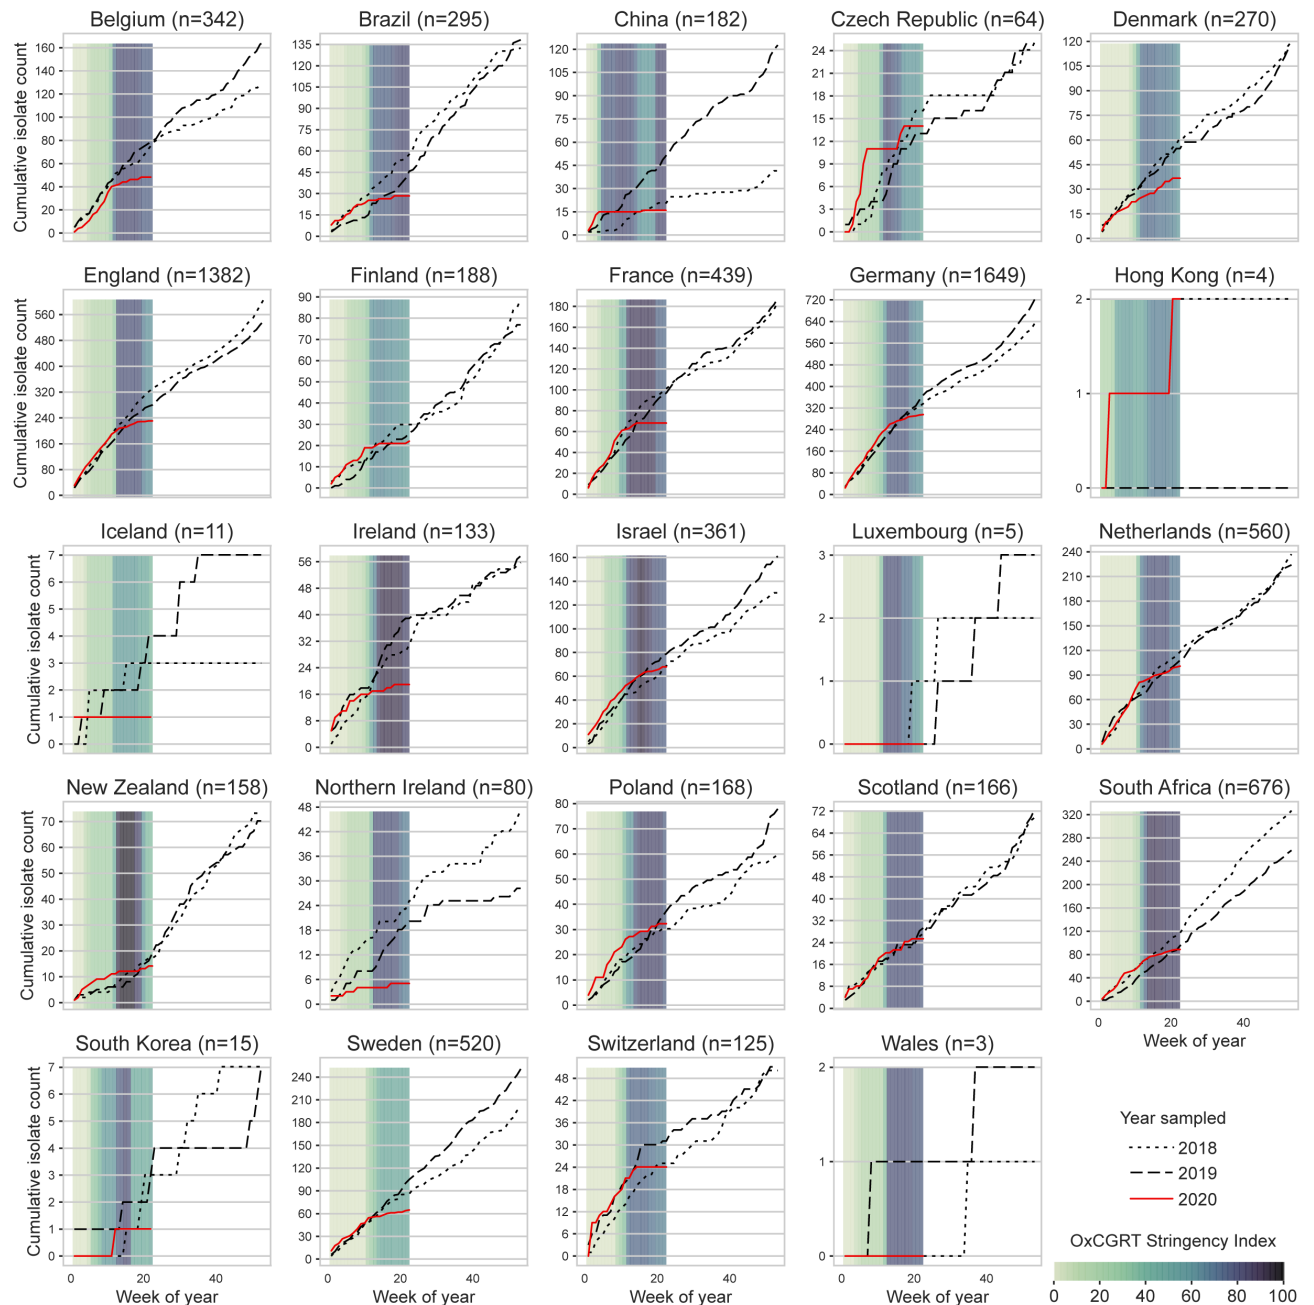

**Supplementary Figure 2. Annual invasive *H influenzae* cases submitted to Invasive Respiratory Infection Surveillance laboratories in 24 countries and territories from Jan 1, 2018, to May 31, 2020.** Coloured bars represent the mean weekly Oxford COVID-19 Government Response Tracker (OxCGRT) stringency index values on a scale from 0-100. Larger (darker) values indicate that higher stringency measures were enacted within a country. Data for South Korea were submitted from two surveillance networks, one of which started invasive disease surveillance in September, 2018, so data presented here for that hospital are only from September, 2018, onwards, whereas the data from the other hospital are from January, 2018, onwards.



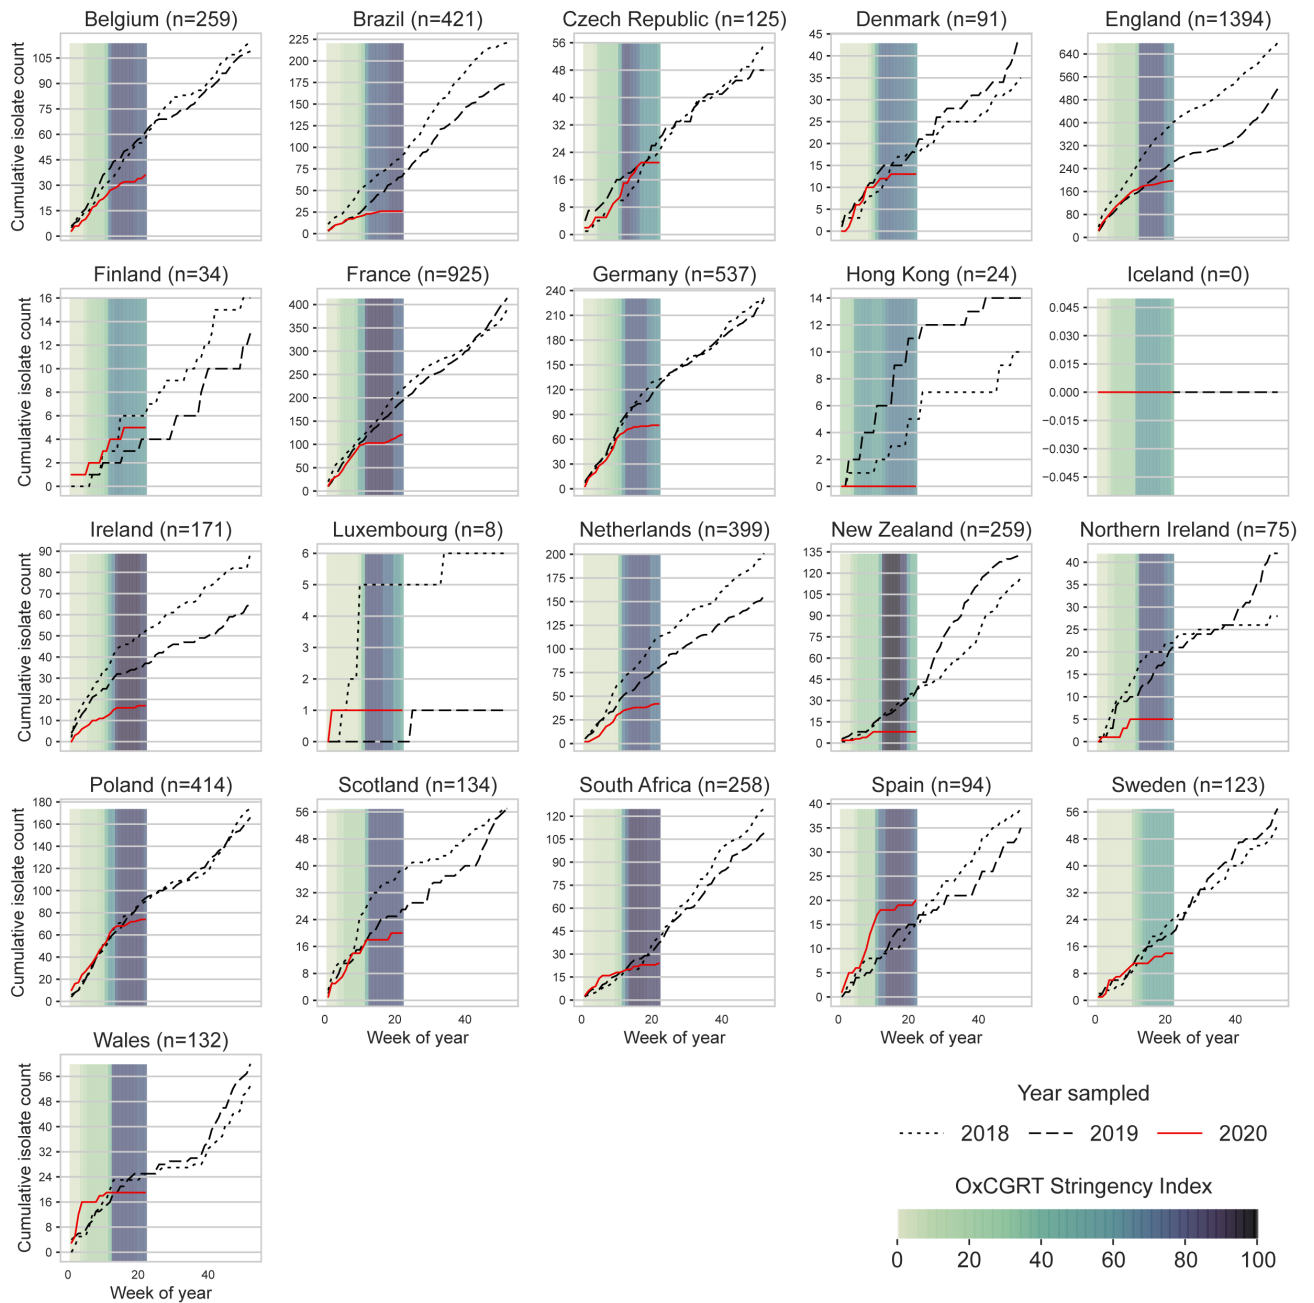

**Supplementary Figure 3. Annual invasive *N meningitidis* cases submitted to Invasive Respiratory Infection Surveillance laboratories in 21 countries and territories from Jan 1, 2018, to May 31, 2020.** Coloured bars represent the mean weekly Oxford COVID-19 Government Response Tracker (OxCGRT) stringency index values on a scale from 0-100. Larger (darker) values indicate that higher stringency measures were enacted within a country.

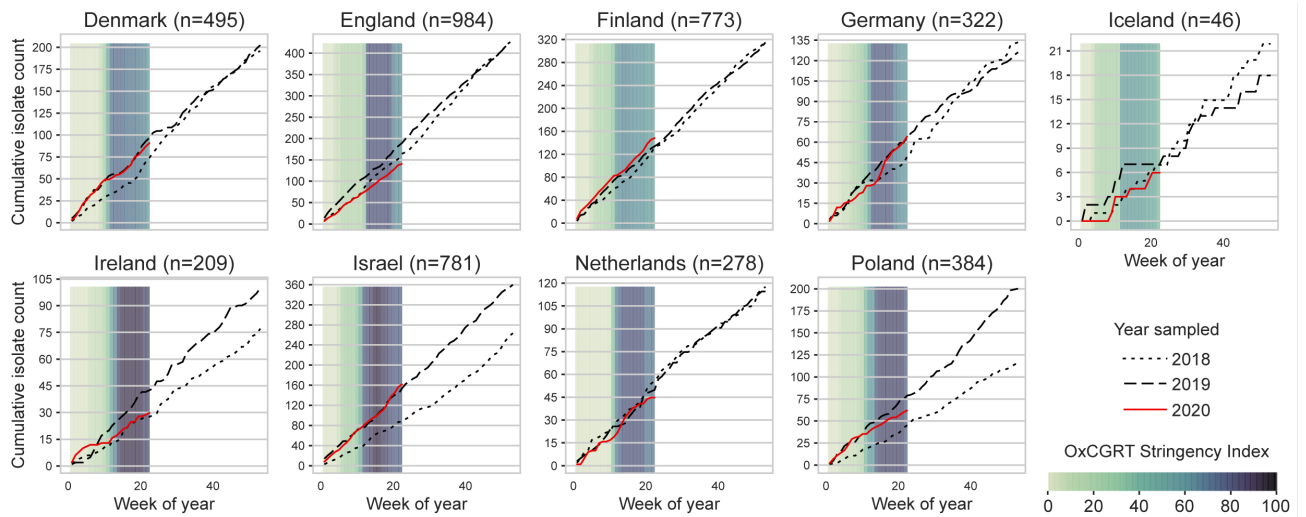

**Supplementary Figure 4. Annual invasive *S. agalactiae* cases submitted to Invasive Respiratory Infection Surveillance laboratories in nine countries from Jan 1, 2018, to May 31, 2020.** Coloured bars represent the mean weekly Oxford COVID-19 Government Response Tracker (OxCGRT) stringency index values on a scale from 0-100. Larger (darker) values indicate that higher stringency measures were enacted within a country.

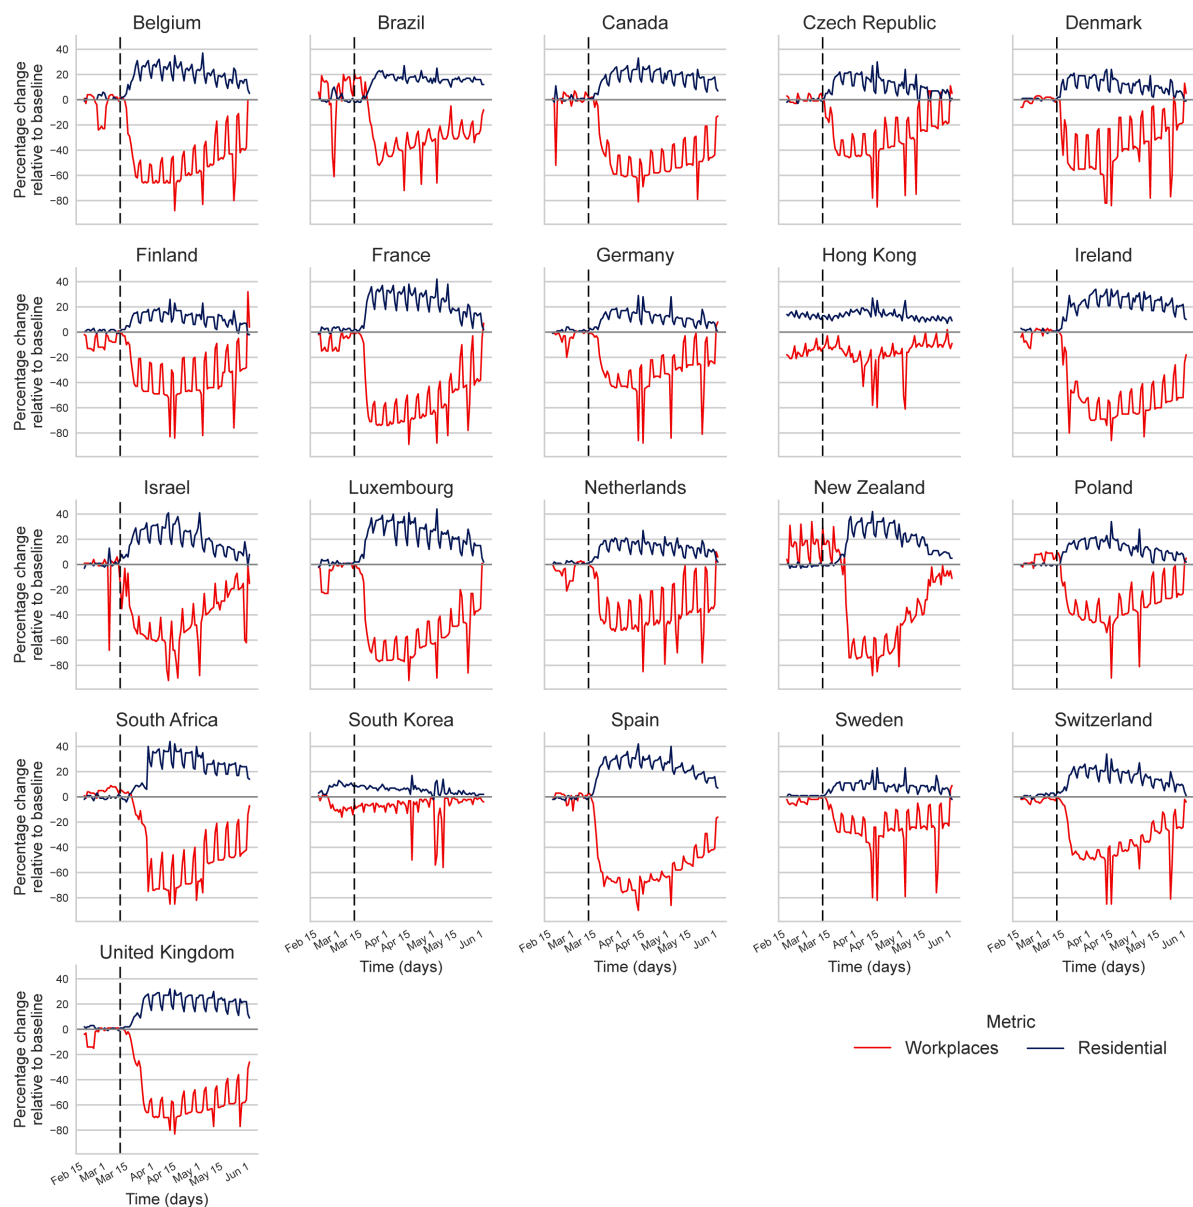

**Supplementary Figure 5. Assessment of the movement of people in Invasive Respiratory Infection Surveillance (IRIS) countries using Google COVID-19 Community Mobility Reports (CCMR) data.** Workplaces and Residential data are plotted for each country participating in IRIS except for China (due to censorship of Google data) and Iceland (the small national population presents a possible privacy breach). Google CCMR data for the United Kingdom aggregated England, Scotland, Wales, and Northern Ireland as one dataset. The dashed vertical line marks week 11, when the WHO officially declared the COVID-19 pandemic. The periodic nature of the graphs is because these are daily data, and the movement of people changes at the weekends; the sharp data spikes typically represent national holidays such as the Easter weekend in mid-April.
